# Supplementary material for: Complete plastome assemblies from a panel of 13 diverse potato taxa
Source: PubMed Central journal article supplement (PMC7544113; doi:10.1371/journal.pone.0240124), 2020-10-08
Supplement: pone.0240124.s002.pdf [file pone.0240124.s002.pdf]

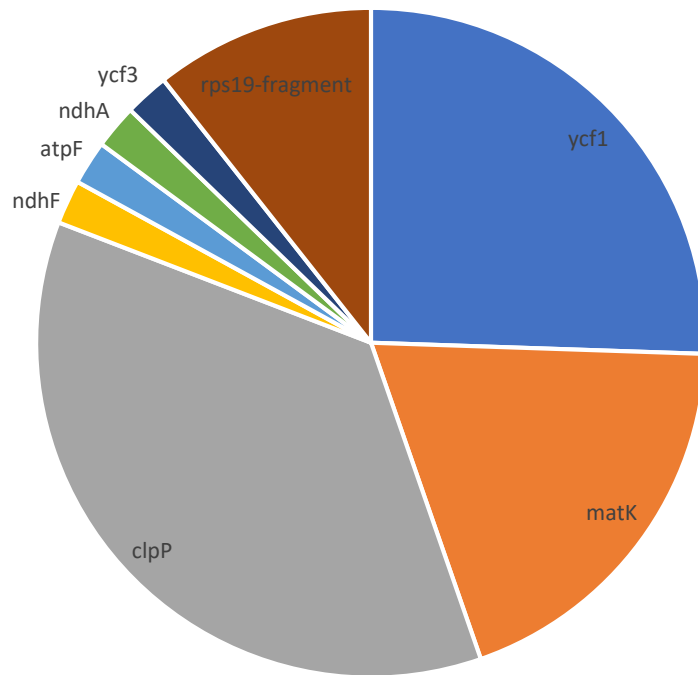

Gene density of InDels
