# Supplementary material for: Complete plastome assemblies from a panel of 13 diverse potato taxa
Source: PubMed Central journal article supplement (PMC7544113; doi:10.1371/journal.pone.0240124), 2020-10-08

(A) TBR BUK2 ADG1 ADG2 GON1  
PvuII PvuII PvuII PvuII PvuII

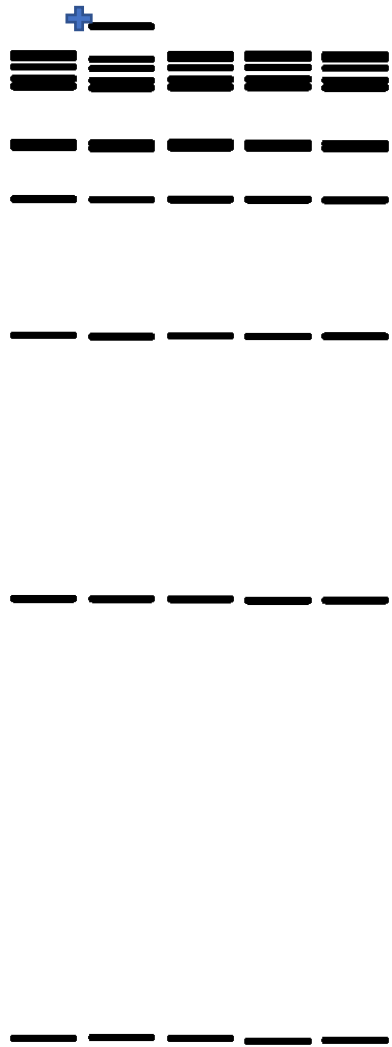

(B) TBR BUK2 ADG1 ADG2 GON1  
BamHI BamHI BamHI BamHI BamHI

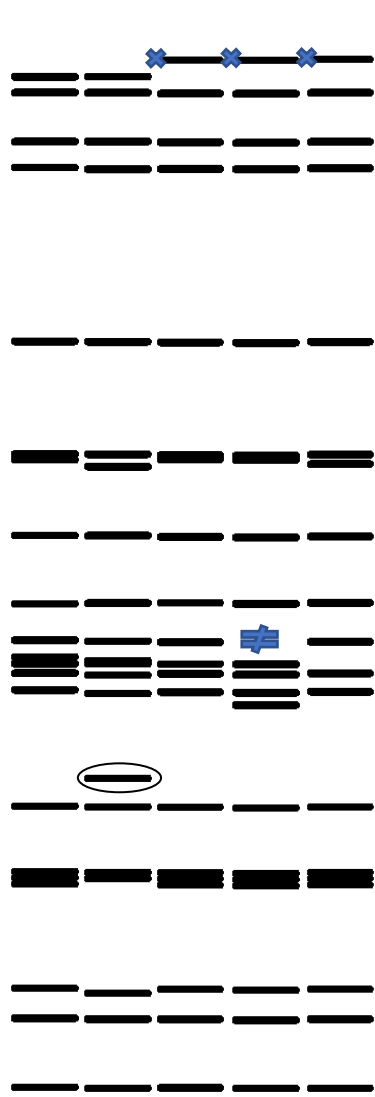

(C) TBR BUK2 ADG1 ADG2 GON1  
HindIII HindIII HindIII HindIII HindIII

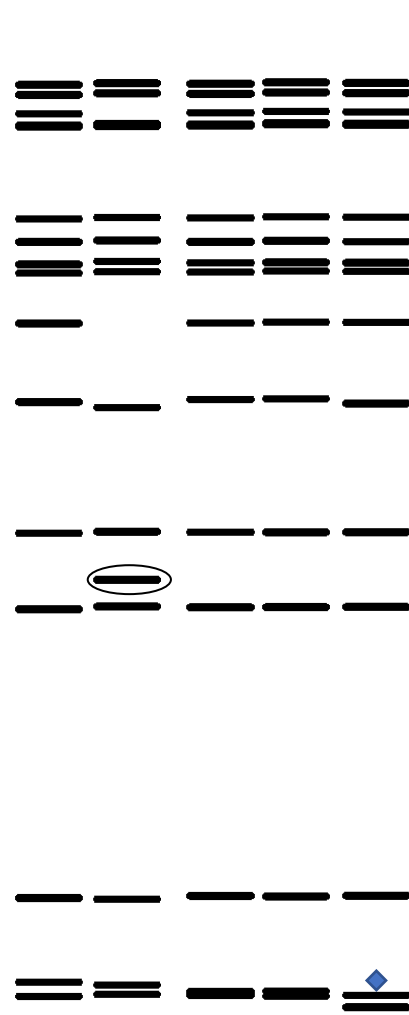

Supplement: pone.0240124.s003.pdf [file pone.0240124.s003.pdf]
