# Supplementary material for: Complete plastome assemblies from a panel of 13 diverse potato taxa
Source: PubMed Central journal article supplement (PMC7544113; doi:10.1371/journal.pone.0240124), 2020-10-08
Supplement: pone.0240124.s004.pdf [file pone.0240124.s004.pdf]

(A)

|                |   |   |   |   |   |   |   |   |   |   |   |   |   |   |   |   |   |   |   |   |   |   |   |   |   |   |   |   |   |
|----------------|---|---|---|---|---|---|---|---|---|---|---|---|---|---|---|---|---|---|---|---|---|---|---|---|---|---|---|---|---|
| 1. adg1        | g | a | a | g | t | a | c | c | a | g | c | t | g | a | g | g | a | c | c | a | a | g | a | a | a | c | t | a | c |
| 2. adg2        | g | a | a | g | t | a | c | c | a | g | c | t | g | a | g | g | a | c | c | a | a | g | a | a | a | c | t | a | c |
| 3. cha         | g | a | a | g | t | a | c | c | a | g | c | t | g | a | g | g | a | c | c | a | a | g | a | a | a | c | t | a | c |
| 4. buk         | g | a | a | g | t | a | c | c | a | g | c | t | g | a | g | g | a | c | c | a | a | g | a | a | a | c | t | a | c |
| 5. cur         | g | a | a | g | t | a | c | c | a | g | c | t | g | a | g | g | a | c | c | a | a | g | a | a | a | c | t | a | c |
| 6. gon1        | g | a | a | g | t | a | c | c | a | g | c | t | g | a | g | g | a | c | c | a | a | g | a | a | a | c | t | a | c |
| 7. gon2        | g | a | a | g | t | a | c | c | a | g | c | t | g | a | g | g | a | c | c | a | a | g | a | a | a | c | t | a | c |
| 8. phu         | g | a | a | g | t | a | c | c | a | g | c | t | g | a | g | g | a | c | c | a | a | g | a | a | a | c | t | a | c |
| 9. stn         | g | a | a | g | t | a | c | c | a | g | c | t | g | a | g | g | a | c | c | a | a | g | a | a | a | c | t | a | c |
| 10. ajh        | g | a | a | g | t | a | c | c | a | g | c | t | g | a | g | g | a | c | c | a | a | g | a | a | a | c | t | a | c |
| 11. juz        | g | a | a | g | t | a | c | c | a | g | c | t | g | a | g | g | a | c | c | a | a | g | a | a | a | c | t | a | c |
| 12. tbr        | g | a | a | g | t | a | c | c | a | g | c | t | g | a | g | g | a | c | c | a | a | g | a | a | a | c | t | a | c |
| 13. bukasovii2 | g | a | a | g | t | a | c | c | a | g | c | t | g | a | g | g | a | c | c | a | a | g | a | a | a | c | t | a | c |

(B)

|                |   |   |   |   |   |   |   |   |   |   |   |   |   |   |   |   |   |   |   |   |   |   |   |   |   |   |   |   |   |   |   |   |
|----------------|---|---|---|---|---|---|---|---|---|---|---|---|---|---|---|---|---|---|---|---|---|---|---|---|---|---|---|---|---|---|---|---|
| 1. adg1        | a | a | t | g | a | t | a | a | a | a | g | a | t | c | c | a | t | t | g | a | t | a | t | t | a | a | t | c | t | a | a | t |
| 2. adg2        | a | a | t | g | a | t | a | a | a | a | g | a | t | c | c | a | t | t | g | a | t | a | t | t | a | a | t | c | t | a | a | t |
| 3. cha         | a | a | t | g | a | t | a | a | a | a | g | a | t | c | c | a | t | t | g | a | t | a | t | t | a | a | t | c | t | a | a | t |
| 4. buk         | a | a | t | g | a | t | a | a | a | a | g | a | t | c | c | a | t | t | g | a | t | a | t | t | a | a | t | c | t | a | a | t |
| 5. cur         | a | a | t | g | a | t | a | a | a | a | g | a | t | c | c | a | t | t | g | a | t | a | t | t | a | a | t | c | t | a | a | t |
| 6. gon1        | a | a | t | g | a | t | a | a | a | a | g | a | t | c | c | a | t | t | g | a | t | a | t | t | a | a | t | c | t | a | a | t |
| 7. gon2        | a | a | t | g | a | t | a | a | a | a | g | a | t | c | c | a | t | t | g | a | t | a | t | t | a | a | t | c | t | a | a | t |
| 8. phu         | a | a | t | g | a | t | a | a | a | a | g | a | t | c | c | a | t | t | g | a | t | a | t | t | a | a | t | c | t | a | a | t |
| 9. stn         | a | a | t | g | a | t | a | a | a | a | g | a | t | c | c | a | t | t | g | a | t | a | t | t | a | a | t | c | t | a | a | t |
| 10. ajh        | a | a | t | g | a | t | a | a | a | a | g | a | t | c | c | a | t | t | g | a | t | a | t | t | a | a | t | c | t | a | a | t |
| 11. juz        | a | a | t | g | a | t | a | a | a | a | g | a | t | c | c | a | t | t | g | a | t | a | t | t | a | a | t | c | t | a | a | t |
| 12. tbr        | a | a | t | g | a | t | a | a | a | a | g | a | t | c | c | a | t | t | g | a | t | a | t | t | a | a | t | c | t | a | a | t |
| 13. bukasovii2 | a | a | t | g | a | t | a | a | a | g | a | t | c | c | a | t | t | g | a | t | a | t | t | a | a | t | c | t | a | a | t |   |

(C)

|                |   |   |   |   |   |   |   |   |   |   |   |   |   |   |   |   |   |   |   |   |   |   |   |   |   |   |   |   |   |   |
|----------------|---|---|---|---|---|---|---|---|---|---|---|---|---|---|---|---|---|---|---|---|---|---|---|---|---|---|---|---|---|---|
| 1. adg1        | t | a | t | g | t | g | g | a | t | c | g | t | t | a | t | t | a | t | c | a | g | t | a | g | c | a | c | t | t | c |
| 2. adg2        | t | a | t | g | t | g | g | a | t | c | g | t | t | a | t | t | a | t | c | a | g | t | a | g | c | a | c | t | t | c |
| 3. cha         | t | a | t | g | t | g | g | a | t | c | g | t | t | a | t | t | a | t | c | a | g | t | a | g | c | a | c | t | t | c |
| 4. buk         | t | a | t | g | t | g | g | a | t | c | g | t | t | a | t | t | a | t | c | a | g | t | a | g | c | a | c | t | t | c |
| 5. cur         | t | a | t | g | t | g | g | a | t | c | g | t | t | a | t | t | a | t | c | a | g | t | a | g | c | a | c | t | t | c |
| 6. gon1        | t | a | t | g | t | g | g | a | t | c | g | t | t | a | t | t | a | t | c | a | g | t | a | g | c | a | c | t | t | c |
| 7. gon2        | t | a | t | g | t | g | g | a | t | c | g | t | t | a | t | t | a | t | c | a | g | t | a | g | c | a | c | t | t | c |
| 8. phu         | t | a | t | g | t | g | g | a | t | c | g | t | t | a | t | t | a | t | c | a | g | t | a | g | c | a | c | t | t | c |
| 9. stn         | t | a | t | g | t | g | g | a | t | c | g | t | t | a | t | t | a | t | c | a | g | t | a | g | c | a | c | t | t | c |
| 10. ajh        | t | a | t | g | t | g | g | a | t | c | g | t | t | a | t | t | a | t | c | a | g | t | a | g | c | a | c | t | t | c |
| 11. juz        | t | a | t | g | t | g | g | a | t | c | g | t | t | a | t | t | a | t | c | a | g | t | a | g | c | a | c | t | t | c |
| 12. tbr        | t | a | t | g | t | g | g | a | t | c | g | t | t | a | t | t | a | t | c | a | g | t | a | g | c | a | c | t | t | c |
| 13. bukasovii2 | t | a | t | g | t | g | g | a | t | c | g | t | t | a | t | t | a | t | c | a | g | t | a | g | c | a | c | t | t | c |

(D)

|                |   |   |   |   |   |   |   |   |   |   |   |   |   |   |   |   |   |   |   |   |   |   |   |   |   |   |   |   |   |   |   |   |   |   |   |   |   |   |   |
|----------------|---|---|---|---|---|---|---|---|---|---|---|---|---|---|---|---|---|---|---|---|---|---|---|---|---|---|---|---|---|---|---|---|---|---|---|---|---|---|---|
| 1. adg1        | a | a | c | a | c | a | t | t | c | a | g | c | t | a | a | c | a | t | t | c | g | a | t | t | t | a | a | a | a | g | c | a | a | t | t | g | c | a |   |
| 2. adg2        | a | a | c | a | c | a | t | t | c | a | g | c | t | a | a | c | a | t | t | c | g | a | t | t | t | a | a | a | a | g | c | a | a | t | t | g | c | a |   |
| 3. cha         | a | a | c | a | c | a | t | t | c | a | g | c | t | a | a | c | a | t | t | c | g | a | t | t | t | a | a | a | a | g | c | a | a | t | t | g | c | a |   |
| 4. buk         | a | a | t | c | a | a | - | - | - | - | - | - | - | - | - | - | - | - | - | - | - | - | - | - | - | - | - | - | - | - | - | - | - | - | - | - | - |   |   |
| 5. cur         | a | a | t | c | a | a | - | - | - | - | - | - | - | - | - | - | - | - | - | - | - | - | - | - | - | - | - | - | - | - | - | - | - | - | - | - |   |   |   |
| 6. gon1        | a | a | t | c | a | a | - | - | - | - | - | - | - | - | - | - | - | - | - | - | - | - | - | - | - | - | - | - | - | - | - | - | - | - | - | - |   |   |   |
| 7. gon2        | a | a | t | c | a | a | - | - | - | - | - | - | - | - | - | - | - | - | - | - | - | - | - | - | - | - | - | - | - | - | - | - | - | - | - | - |   |   |   |
| 8. phu         | a | a | t | c | a | a | - | - | - | - | - | - | - | - | - | - | - | - | - | - | - | - | - | - | - | - | - | - | - | - | - | - | - | - | - | - |   |   |   |
| 9. stn         | a | a | t | c | a | a | - | - | - | - | - | - | - | - | - | - | - | - | - | - | - | - | - | - | - | - | - | - | - | - | - | - | - | - | - | - |   |   |   |
| 10. ajh        | a | a | t | c | a | a | t | t | c | a | g | c | t | a | a | c | a | t | t | c | g | a | t | t | t | a | a | a | a | g | a | a | c | a | t | t | g | c | a |
| 11. juz        | a | a | t | c | a | a | t | t | c | a | g | c | t | a | a | c | a | t | t | c | g | a | t | t | t | a | a | a | a | g | a | a | c | a | t | t | g | c | a |
| 12. tbr        | a | a | t | c | a | a | t | t | c | a | g | c | t | a | a | c | a | t | t | c | g | a | t | t | t | a | a | a | a | g | a | a | c | a | t | t | g | c | a |
| 13. bukasovii2 | a | a | t | c | a | a | t | t | c | a | g | c | t | a | a | c | a | t | t | c | g | a | t | t | t | a | a | a | a | g | a | a | c | a | t | t | g | c | a |
